# Supplementary material for: Exploring Salivary Epithelial Dysfunction in Sjögren’s Disease
Source: MDPI journal article supplement (doi:10.3390/ijms25094973), 2024-05-02
Supplement: s1 [file s1]

## Supplemental File S2. Risk of bias assessment per PRISMA guidelines

### a. Main manuscript references

| Study                         | Risk of bias domains |    |    |    |    | Overall |
|-------------------------------|----------------------|----|----|----|----|---------|
|                               | D1                   | D2 | D3 | D4 | D5 |         |
| Molina et al., 2006           | +                    | -  | +  | +  | +  | -       |
| Gilboe et al., 2001           | -                    | -  | +  | +  | +  | -       |
| Shiboski et al., 2017         | +                    | +  | +  | +  | +  | +       |
| Radfar et al., 2002           | -                    | +  | +  | +  | +  | -       |
| Garreto et al., 2021          | +                    | +  | +  | +  | +  | +       |
| Theander et al., 2015         | +                    | +  | +  | +  | +  | +       |
| Verstappen et al., 2021       | +                    | +  | +  | +  | +  | +       |
| Seror et al., 2015            | +                    | +  | +  | +  | +  | +       |
| Shah et al., 2019             | +                    | +  | +  | +  | +  | +       |
| Fujita-Yoshigaki et al., 2008 | +                    | +  | +  | +  | +  | +       |
| Perez et al., 2005            | +                    | +  | +  | +  | +  | +       |
| Robinson et al., 1996         | -                    | +  | +  | +  | +  | -       |
| Scott et al., 2019            | +                    | +  | +  | +  | +  | +       |
| Kawashima et al., 2011        | -                    | +  | +  | +  | +  | -       |
| Bharaj et al., 2021           | +                    | +  | +  | +  | +  | +       |
| Shiboski et al., 2018         | +                    | +  | +  | +  | +  | +       |
| Sebastian et al., 2018        | +                    | +  | +  | +  | +  | +       |
| Pertovaara et al., 1999       | +                    | +  | +  | -  | -  | -       |
| Soyfoo et al., 2021           | +                    | +  | +  | +  | +  | +       |
| Zhang et al., 2019a           | -                    | +  | +  | -  | +  | -       |
| Cox et al., 2011              | +                    | +  | +  | +  | +  | +       |
| Wu et al., 2019               | -                    | +  | +  | +  | +  | -       |
| Chen et al., 2009             | +                    | +  | +  | +  | +  | +       |
| Veloza et al., 2009           | -                    | +  | +  | +  | +  | -       |
| Zhang et al., 2019b           | +                    | +  | +  | +  | +  | +       |
| Leehan et al., 2017           | +                    | +  | +  | +  | +  | +       |
| Jordan et al., 2011           | +                    | +  | +  | +  | +  | +       |
| Furlan et al., 2008           | +                    | +  | +  | +  | +  | +       |
| Noll et al., 2022             | -                    | +  | +  | +  | +  | -       |
| Wang et al., 2005             | -                    | +  | +  | +  | +  | -       |

Domains:  
D1: Bias arising from the randomization process.  
D2: Bias due to deviations from intended intervention.  
D3: Bias due to missing outcome data.  
D4: Bias in measurement of the outcome.  
D5: Bias in selection of the reported result.

Judgement  
- Some concerns  
+ Low

**b. Figure 1 and Table 1 references**

|                              | Risk of bias domains |    |    |    |    |         |
|------------------------------|----------------------|----|----|----|----|---------|
|                              | D1                   | D2 | D3 | D4 | D5 | Overall |
| Wise and Woodruff, 1993      | +                    | +  | +  | +  | -  | -       |
| Fayyaz et al., 2016          | +                    | +  | +  | +  | +  | +       |
| Radfar et al., 2002          | -                    | +  | +  | +  | +  | -       |
| Daniels et al., 2011         | +                    | +  | +  | +  | +  | +       |
| Risselada et al., 2013       | +                    | +  | +  | +  | +  | +       |
| Risselada et al., 2014       | +                    | +  | +  | +  | +  | +       |
| Carubbi et al., 2015         | +                    | +  | +  | +  | +  | +       |
| Wei et al., 2015             | +                    | +  | +  | +  | +  | +       |
| Theander et al., 2015        | +                    | +  | +  | +  | +  | +       |
| Leehan et al., 2018          | +                    | +  | +  | +  | +  | +       |
| Kakugawa et al., 2018        | +                    | +  | +  | +  | +  | +       |
| Abd-Allah et al., 2019       | +                    | +  | +  | +  | +  | +       |
| Jordan et al., 2011          | +                    | +  | +  | +  | +  | +       |
| Shah et al., 2017            | +                    | +  | +  | +  | +  | +       |
| Shah et al., 2019            | +                    | +  | +  | +  | +  | +       |
| Noll et al., 2022            | -                    | +  | +  | +  | +  | -       |
| Perez et al., 2005           | +                    | +  | +  | +  | +  | +       |
| Schenke-Layland et al., 2008 | +                    | +  | +  | +  | +  | +       |
| Barrera et al., 2013         | +                    | +  | +  | +  | +  | +       |
| Tandon et al., 2017          | -                    | +  | +  | +  | +  | -       |
| Sisto et al., 2018           | +                    | +  | +  | +  | +  | +       |
| Sisto et al., 2019           | +                    | +  | +  | +  | +  | +       |
| Chen et al., 2010            | +                    | +  | +  | +  | +  | +       |
| Ewert et al., 2010           | +                    | +  | +  | +  | +  | +       |
| Velozo et al., 2009          | -                    | +  | +  | +  | +  | -       |
| Riviere et al., 2023         | +                    | +  | +  | +  | +  | +       |

Study

Domains:  
D1: Bias arising from the randomization process.  
D2: Bias due to deviations from intended intervention.  
D3: Bias due to missing outcome data.  
D4: Bias in measurement of the outcome.  
D5: Bias in selection of the reported result.

Judgement  
- Some concerns  
+ Low

**Footnote:**

Risk-of-Bias assessment table using ‘Cochran’s Handbook for Systematic Reviews of Interventions’ Risk-of-bias VISualization (robvis) tool for **a.** references in the main manuscript excluding reviews and **b.** references from Figure 1 and Table 1 manually curated using conventional searches of PubMed and PubMed Central for articles related to Sjogren’s Disease in English.
