# Supplementary material for: Exploring Salivary Epithelial Dysfunction in Sjögren’s Disease
Source: Int J Mol Sci. 2024 May 2;25(9):4973. doi: 10.3390/ijms25094973 (PMC11084897; doi:10.3390/ijms25094973)
Supplement: Supplementary file 1 [file ijms-25-04973-s001.zip]

Archive with 4 entries (4 files):
- Supplemental File 3a. SjD review bias justifications 04 19 2024 FINAL.txt
- Supplemental File 3b. Figure1&Table1 SjD review bias justification 04 19 2024 FINAL.txt
- Supplemental File S1. SjD review keyword filtering 04 19 2024 FINAL.xlsx
- Supplemental File S2. SjD review risk of bias Tables 04 19 2024 FINAL.pdf
