# Supplementary material for: Exploring Salivary Epithelial Dysfunction in Sjögren’s Disease
Source: Int J Mol Sci. 2024 May 2;25(9):4973. doi: 10.3390/ijms25094973 (PMC11084897; doi:10.3390/ijms25094973)
Supplement: Supplementary file 1 [file ijms-25-04973-s001.zip › Supplemental File 3a. SjD review bias justifications 04 19 2024 FINAL.txt]

	Study	D1	D2	D3	D4	D5	Overall
1	Molina et al., 2006	Authors stated 30 patients with pSS were selected, age matched control individuals were selected and 24 patients with no-specific chronic sialodentitis	Intervention was to investigate immunohistochemistry, primary antibodies and complete statistics. Some concerns about visual scale for quantification, may introduce slight bias of quantification	Data on evaluations were presented providing the data with no missing outcome data	Little to no bias in the measurement of outcome. Thirty random fields examined in a blinded manor and a Chi-squared test was completed to evaluate group comparisons	Reported results consisted of visual figures and chi-squared results with little to no bias	Some concerns
2	Gilboe et al., 2001	93 SLE patients with Oslo addresses selected, 6 of 87 patients excluded for age criteria, some concerns, 81 RA patients, 81 healthy controls	Some concerns in data collection due to self reported questionaire. Self reported questionaires may introduce bias and create deviations from intended intervention to compare SLE with RA	All outcome data was reported, low risk of bias	Quantitative measurement of outcomes were provided and two sample t-tests/Chi-squared tests were used to determine significance	Low risk of bias of reported results. All outcomes were reported including non-significant results. Authors do not inflate findings	Some concerns
3	Shiboski et al., 2017	Multi-center cohort study to develop and validate pSS classificaton criteria, randomly selected 1196 vignettes with 'yes'/'no'/'not sure' responses. Little to no risk of bias	Intended intervention was to develop and validate classification criteria using ROC analysis with 95% confidence intervals, little to no risk of bias	All outcome data was reported, low risk of bias	Measurement of outcomes were 'yes'/'no'/ 'not sure' where 'not sure' responses were interpreted as non-gradable. Low risk of bias	All results were reported, no missing outcomes, no risk of bias	Low
4	Radfar et al., 2002	Some concerns due to non-random selection of 99 volunteers including 54 subjects with prior minor salivary gland biopsies	Intended intervention was to record and determine prevalance and severity of lymphocytic infiltration in minor salivary glands of health volunteers. Little to no risk of bias	All findings were reported in the results of the study, no risk of bias	Measurement of outcomes included quantitative results to determine the severity of focal lymphocytic sialadenitis in minor salivary glands, low risk of bias	All outcomes were reported in results of the study, low risk of bias	Some concerns
5	Garreto et al., 2021	40 age, gender, and socioeconomic situation matched adults. Controls consisted of 20 healthy individuals and case group was 20 SS individuals, 10 pSS individuals and 10 secondary SS individuals, low risk of bias	Intended intervention was to report differentially expressed proteases in SS individuals' saliva compared to healthy controls	All outcome data was reported either in the main manuscript or as part of supplmenetal materials or public repositories, low risk of bias	Results measured using mass spectrometry with a false discovery rate of 1% and significance was measured as p<0.05, low risk of bias	All results were reported, no missing outcomes, low risk of bias	Low
7	Theander et al., 2015	All registered patients (117)with pSS where serum samples had been obtained before diagnosis (since 1984-) and registered in 1 of 3 biobanks, controls were randomly selected from sampe biobank matchd for sex and age at time of serumsample acquisition, low risk of bias	Intended intervention was to test serum for presence of autoantibodies to determine how early and how predictive antibodies are of pSS	All outcome data were reported and analyzed using a confidence level of 95%	Measurements included fluorescent staining of antibodies and descriptive statistics to analyze autoantibody profile in relation to the onset of symptoms and the diagnosis of primary SS	All reported results were presented either in the manuscript or as part of a figure or table	Low
6	Verstappen et al., 2021	39 patients with primary Sjogren's syndrome that fulfilled the 2016 ACR-EULAR criteria and 20 non-SS sicca patients age and sex matched to the pSS group, low risk	Intended intervention was to analyze transcriptomes of primary salivary gland and labial salivary gland tissues, peripheral blood mononuclear cells, and compare immune signatures between biopsy positive and negative patient groups and tissues	All outcomes were reported in the study, low risk	Measurments of the study included gene expression, cytokine concentrations, and histological assessments of patients	No outcomes were found as unreported in the study, low risk	low
8	Seror et al., 2015	User guide for the EULAR Sjogren's syndrome disease activity authored by members of the EULAR Sjogren's Task Force	Intended intervention was to create a user guide based on rating ESSDAI items that experts could agree upon.	Measurement of outcome were recommendations/user guide for the ESSDAI for pSS to determine disease activity ad ratings of each domain in pSS	All outcomes were reported, low risk of bias	Selection of reported results were all guidelines members of the EULAR pSS task force, low risk of bias	Low
9	Shah et al., 2019	Salivary gland cell lines A253, HMC-3A, iSGEC-nSS2, and iSGEC-pSS1, labial salivary gland biopsies from xerostomic patients (N=23), low risk	Intended intervention was to assess the expression of MMP9 and ETS1 in salivary gland epithelial cells and investigate regulatory mechanisms in immortalized eptihelial cells	No outcome data was missing from this study, low risk	measurment of outcome included siRNA knockdown and ELISA protein expression, mutagenesis and ChIP, western blots, and immunofluorescence microscopy	No biases were seen in the selection of the reported resuls, low risk	Low
10	Fujita-Yoshigaki et al., 2008	Parotid glands from male rates, isolated acinar cells as subjects, low risk	Intended intervention was to clarify mechanisms of salivary gland dysfunction by identifying signaling pathways involved in SS, low risk	All outcomes were reported in the manuscript/study, low risk	Measurement of outcome included organization of cells, expression and dedifferentiatio	All results were reported on in the main manuscript, low risk	Low
11	Perez et al., 2005	Patients diagnosed with SS and two control groups had LSG biopsies for total RNA extraction, low risk	Intended intervention was investigate correlation between balance of MMPs/TIMPs in the LSGs of SS patients and the degree of inflammation and acinar structure integrity, low risk	All outcomes of the study were reported as results, low risk	Measurements of outcome consisted of RNA concentration, RNA integrity by electophoresis, Western blots to determine relative levels of MMP and TIMP in SS compared to control groups	All results were reported within the results, low risk of bias	Low
12	Robinson et al., 1996	Subjects consisted of BALB/cJ, C3H, CBA, and NOD/Uf mice including males (n=8) and females (n=4) from 3 to 30 weeks, some concerns due to small sample size	Intended intervention was to evaluate temporal changes in salivary gland function in the absence of overt autoimmunity to determine nonautoimmune components in the reduction of salivary gland function common to Sjogren's Syndrome	No outcomes were excluded from the study, low risk	Measurements of outcomes included blood glucose levels, salivary flow, total salivary protein levels, and epithelial growth factor estimations as well as parotid and submandibular excised glands for alpha-amylase activity, gel electrophoresis, western blot analysis, protein sequencing, and histology	All results were reported within the study, low risk	Some concerns
13	Scott et al., 2019	A review of 195 peer-reviewed articles, low risk	Intended intervention was to summarize the understanding of Epithelial-Mesenchymal Transition mechanics and how EMT alters extracellular matrix mechanics and composition,	Review of 195 peer-reviewed articles is presented, low risk of bias	Measurement consisted of a review article describing current knowledge on EMT and ECM, low risk	Results were presented in the form of a peer-reviewed review, low risk of bias	Low
14	Kawashima et al., 2011	Some concerns due to small sample size of 11 tissue samples from patients with dry eye	Intended intervention was to determine telomere length in lacrimal glands of patients with or without Sjogren's Syndrome and investigate the relationship between progenitor cell markers and telomere lengths in both groups	All outcomes of the study were reported, low risk	Measurements of outcome included Telomere-FISH analysis, telomere signal intensity, student t-test, Mann-Whitney U-test, immunohistochemistry, and electron microscopy	All results were reported within the study, low risk	Some concerns
16	Bharaj et al., 2021	Biopsies from 85 pSS patients and 47 age and gender matched non-Sicca controls from between the years 1989 and 2009 following ACR/EULAR criteria, low bias	Intended intervention was to investigate biopsies to determine the initial events that take place triggering the development of focal infiltrates and germinal center-like structures, authors did not stray from the intended intervention	No missing outcome data, low risk of bias	Outcomes were measured using histomorphometric analysis, immunohistochemical analysis and double staining, low risk	All results were reported in the peer-reviewed manuscript	Low
17	Shiboski et al., 2018	Total of 3409 subjects used for the study according to the 2012 ACR criteria for Sjogren's Syndrome, low risk	Intended interventions of the study were to explore phenotypic feature changes of Sjogren's Syndrome over a 2 to 3-year time interval and to explore serologic markers of autoimmunity as predictors of the progression of Sjogren's syndrome, low risk	No missing outcome data was observed, low risk	Outcomes included frequency tables, baseline variables, percent unchanged, signed-rank tests, Kappa statistic, baseline serologic levels, low risk	All results of outcomes were reported, low risk	low
18	Sebastian et al., 2018	68 patients with SS and 43 controls, other autoimmune diseases were excluded, low risk of bias	Intended intervention was to determine if patients with pSS can be distinguished from sicca caused by other pathologies with only clinical data, low risk of bias	All outcome data was reported in this study, low risk of bias	Measurement of outcomes were based on the EULAR's Sjogren's Syndrome Patient Reorted index as well as ESSDAI, ANA, ENA, RF, ESR, CRP, blood count, and protein electrophoresis	All results were reported, low risk of bias	Low
19	Pertovaara et al., 1999	78 total patients were assessed for a follow up after a median of 11 years	Intervention was a follow up assessment of opthalmological examination, histological grading, immunoserological testing, low risk of bias	All outcomes were reported in the manuscript/study, low risk	Some concerns due to only 36% of patients met the criteria for SS, labial biopsies were only performed on 42 patients with grade 0- 2 at baseline, grades 3-4 were observed in 50% of patients at follow up	Some concerns due to missing labial biopsy results of all patients within the study	Some concerns
20	Soyfoo et al., 2021	91 references were investigated to review the pathophysiologic role of IL-33/ST2 in SS	Intervention was to review current knowledge on the role of IL-33/ST2 in the pathogenesis of pSS	Outcomes of 91 references were reported in this review, low risk	Measurements of study was a review consisting of 91 references on the pathogenesis of SS, low risk	All outcomes were reported in the form of a review, low risk	Low
21	Zhang et al., 2019a	Some concerns due to the use of immortalized cell lines without number of replicates specified in the methods	Intervention was to reveal that the increase of ECM proteins in EMT activates IRE1a-XBP1 axis of UPR coupled with HBP to explore therapeutic targets	All outcomes of the study were included in the results, low risk	Measurements included western immunoblots, lectin staining, immunostaining, cell viability assay, proteomics and protein quanification. Some concerns due to only the Andromeda search engine being used for protein identification	All results were reported in the manuscript, low risk	Some concerns
22	Cox et al., 2011	Over 100 references were used as current knowledge for this review	Intervention was to discuss remodeling and homeostasis of the ECM with implications for fibrotic diseases and cancer	Outcomes of over 100 peer-reviewed studies were discussed in this review, low risk	Measurement was a peer-reviewed review of over 100 articles on the subject, low risk	All results were reported in the form of a review article, low risk	Low
24	Wu et al., 2019	Only three samples were used from three female donors aged 22, 57, 63, some concerns	Intervention was to determine the dynamics of salivary microstructure using time-lapse imaging over a 15 hr time frame	No outcome data was missing from this study, low risk	Measurements included immunofluorescence detection, angular velocity, knockdown and inhibitor approaches, low risk	All results were reported in this study, low risk	Some concerns
25	Chen et al., 2009	Breast carcinoma cell lines cultured for knockdown, low risk	Intervention was to compare gene expression profiles of breast carcinoma cells that express integrin a6B4 compared to vector only transfected cells	No outcome data was found to be missing from this study, low risk	measurement of outcome included gene expression	All results were reported either in the main manuscript or as supplemental materials, low risk	Low
26	Velozo et al., 2009	Some concerns due to small sample size of 12 Sjogren syndrome patients without specificing sex of subjects	Intervention was to determine mRNA and protein levels of a6B4 integrin and localization in the salivary glands of patients with SS, no deviations, low risk	Low risk of bias, all outcomes of the study were reported	Measurment of outcomes included protein levels of a6B4 integrin and using RT-PCR and western blot analysis as well as confocal microscopy results of localization of a6B4	No biases were seen in the selection of the reported results, low risk	Some concerns
27	Zhang et al., 2019b	67 participants with labial salivary gland biopsies	Intended intervention was to complete immunohistochemical analysis to determine the subcellular localization of epithelial cell adhesion molecules in labial salivary glands and evaluate diagnostic use of extracellular and intracellular domains for pSS	No missing outcomes were observed, low risk of bias	Measurment of outcomewas immunohistochemical analysis, Chi-square or Fisher's exact test, Mann-Whitney U-test, and Kruskal-Wallis tests, multiple logistic regression, and Reciever Operating Characteristic curves	All results were presented in the main manuscript or as part of supplemental materials, low risk	Low
28	Leehan et al., 2017	Participants included 34 primary Sjogren's Syndrome patients and 28 non-SS patients and a replication set of 35 primary Sjogren's Syndrome patients and 31 non-SS patients, low risk	Intended intervention was to determine fibrotic replacement in SS participants compared to non-SS participants	No outcomes were excluded from the study, low risk	Measurements in the study included clinical data, patient questionnaires, salivary gland biopsy and imaging, fibrosis assessment, fibrosis severity scoring, two-tailed Shapiro-Wilks tests, bivariate and univariate logistic regression, linear regressions, DeLong's test, Youden's index, random forest analysis, low risk	All results were reported within the study, low risk	low
29	Jordan et al., 2011	Review of over 100 articles on epithelial-mesenchymal transition in epithelial stem cells and cancer	Intended intervention was to discuss the current knowledge on epithelial-mesenchymal transition including classifications, implantation events, molecular mechanisms, transcriptional regulations, and epigenetic regulations of trophoblast EMTs in relation to tumor progression	No missing outcome data was observed	Measurement of outcome was a peer-reviewed review article of over 100 references on EMTs	No biases were seen in the selection of review material, low risk	Low
30	Furlan et al., 2008	Mammory tumor cells of mice cultured in DMEM	Intended intervention was to investigate the impact of ETS1 expression on the growth of breast cancer cells and metastatic properties in vivo	All outcomes of the study were included, low risk	Measurements of outcomes included 3D matrix models, proliferation assays, ETS1 knockdown, immunoblotting, and TUNEL assays	All results were reported in the results section of the study, low risk	Low
32	Noll et al., 2022	Salivary gland cell lines A253, HMC-3A, iSGEC-nSS2, and iSGEC-pSS1, some concerns due to studying pSS in non-pSS subjects	Intended and reached interventions were to assess the expression of MMP9 and ETS1 in salivary gland epithelial cells and investigate regulatory mechanisms in immortalized salivary gland epithelial cells	No missing outcomes were observed, low risk of bias	Measurement of outcome was siRNA knockdown with protein expression and mRNA expression, mutagenesis using ChIP, western blots, and immunofluorescence microscopy	All results were presented within the study or supplemental materials, low risk	Some concerns
33	Wang et al., 2005	Some concerns due to using mice with a mixed genetic background	Intended intervention was to determine if ETS1 is required for regulating B cell differentiation in mice and the functional responses that take place, low risk	No missing outcomes were observed, low risk of bias	Measurement of outcomes were RT-PCR, immunoblotting, flow cytometry, immunofluorescence, ELISA, and ELISPOT	All results were reportd in the main manuscript or as supplemental materials, low risk	Some concerns
