# Supplementary material for: Exploring Salivary Epithelial Dysfunction in Sjögren’s Disease
Source: Int J Mol Sci. 2024 May 2;25(9):4973. doi: 10.3390/ijms25094973 (PMC11084897; doi:10.3390/ijms25094973)
Supplement: Supplementary file 1 [file ijms-25-04973-s001.zip › Supplemental File 3b. Figure1&Table1 SjD review bias justification 04 19 2024 FINAL.txt]

Study	D1	D2	D3	D4	D5	Overall
Wise and Woodruff, 1993	Review of 187 patients undergoing minor salivary gland biopsy for pSS over a 9-year period, low risk	Intended intervention was to follow up with 187 patients with pSS to correlate features and biopsies for the diagnosis of pSS	All outcome data was recorded	Measurement of outcome was focus score, Schirmer test, salivary gland swelling, antinuclear antibodies, rheumatoid factor, anti-SSA, anti-SSB, serologic markers, and serologic abnormalities or symptoms	Reported results lacked demographic informatic, some concerns	Some concerns
Fayyaz et al., 2016	A review of 107 articles discussing autoantibodies in Sjogren's Syndrome	Intended intervention was to discuss studies with the subject heading Sjogren's with antibodies and congenital heart block to assess clinical manifestations associated with anti-Ro/SSA and anti-La/SSB antibodies and studies suggesting novel antibodies	All outcome data was discussed in the review, low risk	Measurement of outcome was in the form of a review, low risk	No results were observed to be missing from the study, low concern of bias	Low
Radfar et al., 2002	Some concerns due to non-random selection of 99 volunteers including 54 subjects with prior minor salivary gland biopsies	Intended intervention was to record and determine prevalance and severity of lymphocytic infiltration in minor salivary glands of health volunteers. Little to no risk of bias	All findings were reported in the results of the study, no risk of bias	Measurement of outcomes included quantitative results to determine the severity of focal lymphocytic sialadenitis in minor salivary glands, low risk of bias	All outcomes were reported in results of the study, low risk of bias	Some concerns
Daniels et al., 2011	Specimens included 1,726 labial salivary glands with any pattern of sialadenitis from SICCA participants with histopathological assessments	Intended intervention was to examine associations between labial salivary gland histopathology and other phenotypic features of Sjogren's Syndrome	All outcomes were explored, low risk	Measurment of outcome included baseline questionnaires for demographic data, symptoms, medical history, three specialty examinations, ocular, oral/salivary, and rheumatologic and serologic, H&E staining, histopathologic diagnoses, focus scores, germinal centers, focal lymphocytic sialadenitis presence	All outcomes were reported in the results, supplemental materials, or as a website; low risk of bias	Low
Risselada et al., 2013	Systematic review of 16 articles reporting on ectopic germinal center formation in patients with pSS	Intended intervention was to determine the presence of germinal centers in salivary glands of patients with pSS and how it is related to severity of disease and immunopathologic features	All outcomes were reported in the results of the study, no risk	Measurment of outcomes were presence of pSS patients having germinal center morphology, saliva production, rheumatoid factor, SSA and SSB antibodies, lymphoma development	All outcomes were reported in the results, low risk of bias	Low
Risselada et al., 2014	From 195 patients, 174 with medical charts from pSS patients that attended the medical clinic between 1998 and 2011	Intended intervention was to compare histology results with disease outcomes and EULAR Sjogren Syndrome disease activity index as well as the number of extraglandular manifestations	Outcomes were based on EULAR/ESSDAI crtieria and scoring, low risk	Measurements consisted of Histology and plsma cell measurements by staining, statistical analysis was completed using Mann-Whitney U, Chi-Squared, or Spearmans rank correlation tests. Multiple regression was used to assess diagnostic parameters to predict severity of pSS, low risk	All intended outcomes of the study were reported within the results, low risk	Low
Carubbi et al., 2015	794 pSS patients classified as having pSS with a documented minor salivary gland biopsy, excluding patents with one or more systmic or organ-specific autoimmune disease/s.	Intended intervention included reporting prognostic values of minor salivary gland assessments performed by hematoxilin-eosin staining for the diagnosis of pSS	No outcomes were observed to be missing from the study, low risk	Measurment of outcome included Chisholm and Mason grading system and focus score grading system with Chi-squared test or binary logistic regression	No results were observed to be missing from the study, low concern of bias	Low
Wei et al., 2015	All patients with pSSdiagnosed with pSS (N=100) and 60 healthy individuals, 40 rheumatoid arthritis patients, and 40 systemic lupus erythematosus patients were used for the study. pSS and healthy individuals were age and gender matched, low risk	Intended intervention was to estimate the diagnositic accuracy of antibodies in pSS and investigate correlations of antibodies with clinical and laboratory profiles of patients with pSS	No biases were observed as no outcome data was missing from the study	measurments of outcomes consisted of unstimulated whole saliva and partoid saliva, ELISA assays, serum anti-SSA/B, ANA, rheumatoid factor, and IgG data. Data was analyzed using Pearson's test and McNemar test or t-test.	All results were included within the study, low risk	Low
Theander et al., 2015	All registered patients (117)with pSS where serum samples had been obtained before diagnosis (since 1984-) and registered in 1 of 3 biobanks, controls were randomly selected from sampe biobank matchd for sex and age at time of serumsample acquisition, low risk of bias	Intended intervention was to test serum for presence of autoantibodies to determine how early and how predictive antibodies are of pSS	All outcome data were reported and analyzed using a confidence level of 95%	Measurements included fluorescent staining of antibodies and descriptive statistics to analyze autoantibody profile in relation to the onset of symptoms and the diagnosis of primary SS	All reported results were presented either in the manuscript or as part of a figure or table	Low
Leehan et al., 2018	34 pSS and 28 nSS sicca patients and replications (35 pSS and 31 nSS) minor salivary gland cross-sections from haematoxylin and eosin stained slides were used for the study	Intended intervention was to evaluate minor salivary glands for the presence of fibrosis in pSS to determine as function of disease pathology or a consequence of aging	No outcome data was observed to be missing from the study, low risk	Measurment included salivary glan fibrosis measurements, age, clinical measures evaluated using the Spearman correlation. Associations with SS were evaluated using receiver operating characteristic curves, variable selection using random forests, and uni and bi-variate regression, low risk	No results were observed to be missing from the study, low concern of bias	Low
Kakugawa et al., 2018	A retrospective study of 101 pSS patient records with high-resolution computed tomography, low risk	Intervention was to investigate risk factors for lung involvement	All outcomes were reported and analyzed using a confidence level of p<0.05, low risk	Measurements included high-resolution computed tomography, age, dry mouth, focus scores analyzed using multivariable analysis	No results were observed to be missing from the study, low concern of bias	Low
Abd-Allah et al., 2019	111 dry eye patients from Minia University's Ophthalmology Outpatient clinic and Rheumatology Outpatient clinic	Intended intervention was to determine the frequency of primary or secondary SS to rheumatic disease in patients with dry eye to assess the most accurate test for diagnosis of SS	No outcomes were observed to be missing from the study, low risk	Measurements of the study's outcomes included Schirmer test, tear-film break-up time, diagnosis of SS based on criteria of the 2012 American College of Rheumatology, clinical examinations, serological testing, ocular testing, and labial salivary gland biopsies	All results from the study were reported, low risk	Low
Jordan et al., 2011	Review of over 100 articles on epithelial-mesenchymal transition in epithelial stem cells and cancer	Intended intervention was to discuss the current knowledge on epithelial-mesenchymal transition including classifications, implantation events, molecular mechanisms, transcriptional regulations, and epigenetic regulations of trophoblast EMTs in relation to tumor progression	No missing outcome data was observed	Measurement of outcome was a peer-reviewed review article of over 100 references on EMTs	No biases were seen in the selection of review material, low risk	Low
Shah et al., 2017	All human genes were selected that are associated with SS, SLE, and RA using Anni and GEO2R datasets were obtained	Intended intervention was to determine genes potentially involved in SS pathogenesis, low risk of bias	All outcome data are publicly available and resourced, low risk of bias	Measurement of outcome included functional network analysis and differential gene expression, low risk of bias	All results were presented in the main manuscript or as supplemental materials, low risk of bias	Low
Shah et al., 2019	Salivary gland cell lines A253, HMC-3A, iSGEC-nSS2, and iSGEC-pSS1, labial salivary gland biopsies from xerostomic patients (N=23), low risk	Intended intervention was to assess the expression of MMP9 and ETS1 in salivary gland epithelial cells and investigate regulatory mechanisms in immortalized eptihelial cells	No outcome data was missing from this study, low risk	measurment of outcome included siRNA knockdown and ELISA protein expression, mutagenesis and ChIP, western blots, and immunofluorescence microscopy	No biases were seen in the selection of the reported resuls, low risk	Low
Noll et al., 2022	Salivary gland cell lines A253, HMC-3A, iSGEC-nSS2, and iSGEC-pSS1, some concerns due to studying pSS in non-pSS subjects	Intended and reached interventions were to assess the expression of MMP9 and ETS1 in salivary gland epithelial cells and investigate regulatory mechanisms in immortalized salivary gland epithelial cells	No missing outcomes were observed, low risk of bias	Measurement of outcome was siRNA knockdown with protein expression and mRNA expression, mutagenesis using ChIP, western blots, and immunofluorescence microscopy	All results were presented within the study or supplemental materials, low risk	Some concerns
Perez et al., 2005	Patients diagnosed with SS and two control groups had LSG biopsies for total RNA extraction, low risk	Intended intervention was investigate correlation between balance of MMPs/TIMPs in the LSGs of SS patients and the degree of inflammation and acinar structure integrity, low risk	All outcomes of the study were reported as results, low risk	Measurments of outcome consisted of RNA concentration, RNA integrity by electophoresis, Western blots to determine relative levels of MMP and TIMP in SS compared to control groups	All results were reported within the results, low risk of bias	Low
Schenke-Layland et al., 2008	Lacrimal glands of non-obese diabetic mice, low risk	Intended intervention was to determine the impact of SS on extracellular matrix structures of healthy and diseased mice, authors did not stray from this intervention	No outcomes were observed to be missing from the study, low risk	Measurments included examination of tissues using histological, biochemical, immunohistochemical and gene expression analysis.	All results of outcomes were reported within the results or supplemental figures of the study, low risk	Low
Barrera et al., 2013	A comprehensive review of over 140 articles on SS and epithelial targets, low risk of bias	Intended intervention was to review literature and discuss epithelitis and Sjogren's Syndrome, low risk	All outcome data was reported as a review, low risk	Measurement of outcome was a review article, low risk of bias	All results were reported in the form of a review article, low risk	Low
Tandon et al., 2017	Some concerns due to authors not specifying number of subjects in study or the number of laser microdissections	Intended intervention was to explore molecular details of the different cell types of salivary glands and altered gene expression profiles in pSS patients	All outcome data was reported within the results section of the study, low risk	Measurement of outcome was RNA-seq analysis and immunofluorescence.	No results were observed to be missing from the study, low concern of bias	Some concerns
Sisto et al., 2018	Review of over 100 articles investigating the EMT in salivary gland disease	Intervention was to discuss the latest findings in terms of EMT, inflammation, fibrosis, cancer on EMT dependent tissue fibrosis during chronic salivary gland conditions and salivary gland tumors	Outcomes of over 100 references were reported in this review, low risk	Measurement was a review on over 100 peer-reviewed articles	All outcomes were reported in the form of a review, low risk	Low
Sisto et al., 2019	36 pSS minor salivary gland biopsies with ACR/EULAR classification criterais for pSS, Human IL-17 and recombinant human IL-22, mouse anti-human B-actin monoclonal antibody clone AC-15, mouse anti-human E-cadherin mAb, mouse anti-human vimentin mAb, and rabbit anti-human collagen type I polyclonal anibodies were used for the study, low risk	Intended intervention was to make a negative correlation of E-cadherin expression and a positive correlation of mesenchymal vimentin and collagn type I expression with increasing tissue inflammation in pSS salivary gland specimen as well as determine if IL-17 and IL-22 contribute to the epithelial mesenchymal transition dependent fibrosis process	No missing outcome data was observed, low risk	Measurements of the study's outcomes included histochemistry, collagen expression analysis, aperio digital analysis, cell cultures, RT-PCR and qRT-PCR, and sequence analysis as well as western blots, and flow cytometry	All results were reported in the results section of the study, low risk	Low
Chen et al., 2009	Breast carcinoma cell lines cultured for knockdown, low risk	Intervention was to compare gene expression profiles of breast carcinoma cells that express integrin a6B4 compared to vector only transfected cells	No outcome data was found to be missing from this study, low risk	measurement of outcome included gene expression	All results were reported either in the main manuscript or as supplemental materials, low risk	Low
Ewert et al., 2010	22 patients with pSS and 15 controls age and sex matched	Intervention was to evaluate expression and localization of tight junction proteins in labial salivary glands of patients with pSS and determine in vitro effects of tumor necrosis factor alpha and interferon-gamma on tight junction integrity of isolated acini from controls, authors did not stray from their intended interventions	All outcome data was present within the study, no risk	Measurements of outcomes included semiquantitative RT-PCR and western blotting, immunohistochemistry, transmission electron microscopy	All results were reported within the study, low risk	Low
Velozo et al., 2009	Some concerns due to small sample size of 12 Sjogren syndrome patients without specificing sex of subjects	Intervention was to determine mRNA and protein levels of a6B4 integrin and localization in the salivary glands of patients with SS, no deviations, low risk	Low risk of bias, all outcomes of the study were reported	Measurment of outcomes included protein levels of a6B4 integrin and using RT-PCR and western blot analysis as well as confocal microscopy results of localization of a6B4	No biases were seen in the selection of the reported results, low risk	Some concerns
Riviere et al., 2023	Normal salivary gland- SV40 transformed-squamous cells resembling acinar cells were used as the test subject as well as minor salivary gland biopsies from patients referred for suspicion of pSS, peripheral mononuclear cells isolated from residual blood from healthy subjects, primary cultures of salivary gland epithelial cells from pSS and controls	Author's intended intervention was to decipher links between hyperosmolar stimulation of salivary gland epithelial cells and lymphocytic infiltration of salivary glands in pSS	No missing outcome data was observed, low risk	Measurements included RNAsq, and RT-qPCR	All results were reported within the study, low risk	Low
