# Supplementary material for: Exploring Salivary Epithelial Dysfunction in Sjögren’s Disease
Source: Int J Mol Sci. 2024 May 2;25(9):4973. doi: 10.3390/ijms25094973 (PMC11084897; doi:10.3390/ijms25094973)
Supplement: Supplementary file 1 [file ijms-25-04973-s001.zip › Supplemental File S1. SjD review keyword filtering 04 19 2024 FINAL.xlsx]

## Sheet: Sheet1
Sjögren's Disease Keywords
acinar damage
ACR
altered B cell differentiation
autoimmune exocrinopathy
basal lamina
current therapies
dedifferentiation
early diagnosis
ECM
EMT
epigenetics
epithelial cell adhesion
epithelial mesenchymal transition
epithelitis
ESSDAI
ETS1
EULAR classification
extracellular matrix
focal adhesion
focus score
genetics
homeostasis
Immune cell
immune cell alteration
integrin
interferon
interleukin
LEF1
Lymphocyte infiltration
lymphoma
lymphomagenesis
matrix metalloproteinase
minor salivary glands
MMP
MMP9
p38 MAP kinases
pathogenesis
pathophysiology
remodeling
rheumatoid arthritis
salivary dysfunction
salivary gland
salivary gland disease
salivary gland hypofunction
salivary gland stem cells
salivary hypofunction
salivary progenitor cells
salivary proteases
salivary stem cells
sicca syndrome
Sjogren Disease
Sjogren syndrome
stimulated salivary flow
systemic lupus erythematosus
therapy
treatment
xerostomia
